# Supplementary material for: An HIV-1 gp41 peptide-liposome vaccine elicits neutralizing epitope-targeted antibody responses in healthy individuals
Source: PubMed Central journal article supplement — medRxiv. 2025 Aug 22:2024.03.15.24304305. Originally published 2024 Mar 18. Preprint. [Version 2] doi: 10.1101/2024.03.15.24304305 (PMC10984077; doi:10.1101/2024.03.15.24304305), 2025-08-22
Supplement: media-1.pdf [file media-1.pdf]

**Table S1. ELISA binding of sera Abs against wild-type and mutant MPER.03 peptide**

| PTID   | visit 2 (baseline) - M0 |            |       | visit 3 (post 1st) - M0.5 |            |       | visit 5 (post 2nd) - M2.5 |            |       | visit 7 (post 3rd) - M6.5 |            |       | visit 8 (M9) |            |       | visit 9 (M12) |            |       |
|--------|-------------------------|------------|-------|---------------------------|------------|-------|---------------------------|------------|-------|---------------------------|------------|-------|--------------|------------|-------|---------------|------------|-------|
|        | WT                      | D664AW672A | Ratio | WT                        | D664AW672A | Ratio | WT                        | D664AW672A | Ratio | WT                        | D664AW672A | Ratio | WT           | D664AW672A | Ratio | WT            | D664AW672A | Ratio |
| 133-23 | 0                       | 0          | 0     | 0                         | 0          | 0.00  | 6.97                      | 3.16       | 2.2   | 6.604                     | 3.408      | 1.9   |              |            |       | 3.358         | 0.793      | 4.2   |
| 133-35 | 0                       | 0          | 0     | 0                         | 0          | 0.00  | 1.25                      | 0.02       | 54.3  | 2.591                     | 0.282      | 9.2   | 0.474        | 0.119      | und   | 0.131         | 0          | und   |
| 133-04 | 0                       | 0          | 0     | 0                         | 0          | 0.00  | 2.87                      | 0.24       | 12.0  |                           |            |       |              |            |       |               |            |       |
| 133-33 | 0                       | 0          | 0     | 0                         | 0          | 0.00  | 3.29                      | 0.39       | 8.5   | 2.921                     | 0.406      | 7.2   |              |            |       | 0.218         | 0          | und   |
| 133-18 | 0                       | 0          | 0     | 0                         | 0          | 0.00  | 1.80                      | 0.25       | 7.3   |                           |            |       | 0.143        | 0.025      | und   |               |            |       |
| 133-20 | 0                       | 0          | 0     | 0                         | 0          | 0.00  | 0.24                      | 0.00       | und   |                           |            |       | 0            | 0          | 0.0   |               |            |       |
| 133-07 | 0                       | 0          | 0     | 0                         | 0          | 0.00  | 1.48                      | 0.20       | 7.4   | 0.144                     | 0          | und   | 0            | 0.116      | und   |               |            |       |
| 133-30 | 0                       | 0          | 0     | 0                         | 0          | 0.00  | 4.18                      | 1.52       | 2.7   |                           |            |       |              |            |       | 2.702         | 0.714      | 3.8   |
| 133-12 | 0                       | 0          | 0     | 0                         | 0          | 0.00  | 5.22                      | 2.97       | 1.8   |                           |            |       | 0.193        | 0          | und   |               |            |       |
| 133-13 | 0                       | 0          | 0     | 0                         | 0          | 0.00  | 1.67                      | 0.26       | 6.4   |                           |            |       | 0.123        | 0          | und   |               |            |       |
| 133-29 | 0                       | 0          | 0     | 0.015                     | 0.005      | und   | 3.64                      | 0.81       | 4.5   |                           |            |       | 0.195        | 0.05       | und   |               |            |       |
| 133-21 | 0                       | 0          | 0     | 0                         | 0          | 0.00  | 1.92                      | 0.49       | 3.9   |                           |            |       | 0.141        | 0.104      | und   |               |            |       |
| 133-24 | 0                       | 0          | 0     | 0                         | 0          | 0.00  | 3.91                      | 0.51       | 7.7   |                           |            |       | 0.65         | 0.027      | und   |               |            |       |
| 133-27 | 0                       | 0          | 0     | 0                         | 0          | 0.00  | 0.85                      | 0.12       | 7.1   |                           |            |       | 0            | 0          | 0.0   |               |            |       |
| 133-39 | 0                       | 0          | 0     | 0                         | 0          | 0.00  | 0.24                      | 0.00       | und   | 4.307                     | 2.123      | 2.03  |              |            |       |               |            |       |
| 133-37 | 0                       | 0          | 0     | 0                         | 0          | 0.00  | 3.84                      | 0.22       | 17.6  |                           |            |       | 0.047        | 0          | und   |               |            |       |
| 133-03 | 0                       | 0          | 0     | 0                         | 0          | 0.00  | 4.36                      | 0.74       | 5.9   |                           |            |       | 0.185        | 0.033      | und   |               |            |       |
| 133-06 | 0                       | 0          | 0     | 0                         | 0.042      | 0.00  | 2.30                      | 0.49       | 4.7   |                           |            |       | 0            | 0          | 0.0   |               |            |       |
| 133-25 | 0                       | 0          | 0     | 0                         | 0          | 0.00  | 4.86                      | 1.28       | 3.8   |                           |            |       | 0.233        | 0          | und   |               |            |       |
| 133-31 | 0                       | 0          | 0     | 0                         | 0          | 0.00  | 1.70                      | 0.14       | 12.3  |                           |            |       |              |            |       |               |            |       |

Binding values are reported as Log AUC.

Values at baseline are used for subtraction of post-vaccination timepoints.

Differential binding Abs (yellow fill) bind MPER.03  $\geq 2.5$  fold better than MPER.03\_D664A\_W672A mutant.

Und (undetermined); MPER binding Log AUC values  $< 1.0$ , therefore calculation of differential binding is unreliable.

Blnak well - no sample available for testing

Not shown: placebo recipients had low level to no binding to both MPER peptides and PEG (Log AUC  $< 1.0$ ) - 133-17, 133-32, 133-01 and 133-02.
