# Supplementary material for: An HIV-1 gp41 peptide-liposome vaccine elicits neutralizing epitope-targeted antibody responses in healthy individuals
Source: PubMed Central journal article supplement — medRxiv. 2025 Aug 22:2024.03.15.24304305. Originally published 2024 Mar 18. Preprint. [Version 2] doi: 10.1101/2024.03.15.24304305 (PMC10984077; doi:10.1101/2024.03.15.24304305), 2025-08-22
Supplement: media-2.pdf [file media-2.pdf]

**Table S2: Neutralization profile of sera Abs in HVTN133**

**Assays:** Neutralization in T2M-bl/T2M-bl/FcgR1 cells

**Viruses:** All are Env-pseudotyped viruses produced in 293T cells

**Vaccine groups:**

Low dose (T1), Placebo (C1)

High dose (T2), Placebo (C2)

|          |        |               |       |        | ID50 (dilution) in T2M-bl or T2M-bl/FcyR1 |               |            |                    |               |            | ID80 (dilution) in T2M-bl or T2M-bl/FcyR1 |               |            |                    |               |            |
|----------|--------|---------------|-------|--------|-------------------------------------------|---------------|------------|--------------------|---------------|------------|-------------------------------------------|---------------|------------|--------------------|---------------|------------|
|          |        |               |       |        | T2M-bl cells                              |               |            | T2M-bl/FcyR1 cells |               |            | T2M-bl cells                              |               |            | T2M-bl/FcyR1 cells |               |            |
| Protocol | PTID   | Vaccine group | Visit | Sample | CW07-09                                   | CW07-10       | CW07-11    | CW07-09            | CW07-10       | CW07-11    | CW07-09                                   | CW07-10       | CW07-11    | CW07-09            | CW07-10       | CW07-11    |
|          |        |               |       |        | ID#5664                                   | ID#1954DB2    | ID#5023    | ID#5664            | ID#1954DB2    | ID#5023    | ID#5664                                   | ID#1954DB2    | ID#5023    | ID#5664            | ID#1954DB2    | ID#5023    |
|          |        |               |       |        | HXB2                                      | W61D(TCLA).71 | SC422661.8 | HXB2               | W61D(TCLA).71 | SC422661.8 | HXB2                                      | W61D(TCLA).71 | SC422661.8 | HXB2               | W61D(TCLA).71 | SC422661.8 |
| HVTN 133 | 133-32 | C2            | 5     | SER    | <10                                       | <10           | <10        | <10                | <10           | <10        | <10                                       | <10           | <10        | <10                | <10           | <10        |
| HVTN 133 | 133-03 | T2            | 5     | SER    | <10                                       | <10           | <10        | <10                | <10           | <10        | <10                                       | <10           | <10        | <10                | <10           | <10        |
| HVTN 133 | 133-27 | T2            | 5     | SER    | <10                                       | <10           | <10        | <10                | <10           | <10        | <10                                       | <10           | <10        | <10                | <10           | <10        |
| HVTN 133 | 133-06 | T2            | 5     | SER    | <10                                       | <10           | <10        | <10                | <10           | <10        | <10                                       | <10           | <10        | <10                | <10           | <10        |
| HVTN 133 | 133-37 | T2            | 5     | SER    | <10                                       | <10           | <10        | <10                | <10           | <10        | <10                                       | <10           | <10        | <10                | <10           | <10        |
| HVTN 133 | 133-25 | T2            | 5     | SER    | <10                                       | <10           | <10        | <10                | <10           | <10        | <10                                       | <10           | <10        | <10                | <10           | <10        |
| HVTN 133 | 133-39 | T1            | 5     | SER    | <10                                       | <10           | <10        | <10                | <10           | <10        | <10                                       | <10           | <10        | <10                | <10           | <10        |
| HVTN 133 | 133-04 | T1            | 5     | SER    | <10                                       | <10           | <10        | <10                | <10           | <10        | <10                                       | <10           | <10        | <10                | <10           | <10        |
| HVTN 133 | 133-07 | T1            | 5     | SER    | <10                                       | <10           | <10        | <10                | <10           | <10        | <10                                       | <10           | <10        | <10                | <10           | <10        |
| HVTN 133 | 133-17 | C1            | 5     | SER    | <10                                       | <10           | <10        | <10                | <10           | <10        | <10                                       | <10           | <10        | <10                | <10           | <10        |
| HVTN 133 | 133-35 | T1            | 5     | SER    | <10                                       | <10           | <10        | <10                | <10           | <10        | <10                                       | <10           | <10        | <10                | <10           | <10        |
| HVTN 133 | 133-23 | T1            | 5     | SER    | <10                                       | <10           | <10        | <10                | <10           | <10        | <10                                       | <10           | <10        | <10                | <10           | <10        |
| HVTN 133 | 133-30 | T2            | 5     | SER    | <10                                       | <10           | <10        | <10                | <10           | <10        | <10                                       | <10           | <10        | <10                | <10           | <10        |
| HVTN 133 | 133-02 | C2            | 5     | SER    | <10                                       | <10           | <10        | <10                | <10           | <10        | <10                                       | <10           | <10        | <10                | <10           | <10        |
| HVTN 133 | 133-13 | T2            | 5     | SER    | <10                                       | <10           | <10        | <10                | <10           | <10        | <10                                       | <10           | <10        | <10                | <10           | <10        |
| HVTN 133 | 133-12 | T2            | 5     | SER    | <10                                       | <10           | <10        | <10                | <10           | <10        | <10                                       | <10           | <10        | <10                | <10           | <10        |
| HVTN 133 | 133-29 | T2            | 5     | SER    | <10                                       | <10           | <10        | <10                | <10           | <10        | <10                                       | <10           | <10        | <10                | <10           | <10        |
| HVTN 133 | 133-20 | T2            | 5     | SER    | <10                                       | <10           | <10        | <10                | <10           | <10        | <10                                       | <10           | <10        | <10                | <10           | <10        |
| HVTN 133 | 133-31 | T2            | 5     | SER    | <10                                       | <10           | <10        | <10                | <10           | <10        | <10                                       | <10           | <10        | <10                | <10           | <10        |
| HVTN 133 | 133-01 | C2            | 5     | SER    | <10                                       | <10           | <10        | <10                | <10           | <10        | <10                                       | <10           | <10        | <10                | <10           | <10        |
| HVTN 133 | 133-33 | T2            | 5     | SER    | <10                                       | <10           | <10        | <10                | <10           | <10        | <10                                       | <10           | <10        | <10                | <10           | <10        |
| HVTN 133 | 133-18 | T2            | 5     | SER    | <10                                       | <10           | <10        | <10                | <10           | <10        | <10                                       | <10           | <10        | <10                | <10           | <10        |
| HVTN 133 | 133-24 | T2            | 5     | SER    | <10                                       | <10           | <10        | <10                | <10           | <10        | <10                                       | <10           | <10        | <10                | <10           | <10        |
| HVTN 133 | 133-21 | T2            | 5     | SER    | <10                                       | <10           | <10        | <10                | <10           | <10        | <10                                       | <10           | <10        | <10                | <10           | <10        |
| HVTN 133 | 133-32 | C2            | 7     | SER    | <10                                       | <10           | <10        | <10                | <10           | <10        | <10                                       | <10           | <10        | <10                | <10           | <10        |
| HVTN 133 | 133-07 | T1            | 7     | SER    | <10                                       | <10           | <10        | <10                | <10           | <10        | <10                                       | <10           | <10        | <10                | <10           | <10        |
| HVTN 133 | 133-23 | T1            | 7     | SER    | <10                                       | <10           | <10        | <10                | <10           | <10        | <10                                       | <10           | <10        | <10                | <10           | <10        |
| HVTN 133 | 133-35 | T1            | 7     | SER    | <10                                       | <10           | <10        | <10                | <10           | <10        | <10                                       | <10           | <10        | <10                | <10           | <10        |
| HVTN 133 | 133-17 | C1            | 7     | SER    | <10                                       | <10           | <10        | <10                | <10           | <10        | <10                                       | <10           | <10        | <10                | <10           | <10        |
| HVTN 133 | 133-39 | T1            | 7     | SER    | <10                                       | <10           | <10        | <10                | <10           | <10        | <10                                       | <10           | <10        | <10                | <10           | <10        |
| HVTN 133 | 133-33 | T2            | 7     | SER    | <10                                       | <10           | <10        | <10                | <10           | <10        | <10                                       | <10           | <10        | <10                | <10           | <10        |
| CH01-31  |        |               |       |        | 0.12                                      | 2.19          | 0.20       | 0.11               | 1.64          | 0.21       | 0.761                                     | 8.497         | 0.836      | 0.809              | 7.599         | 0.689      |
| 2F5      |        |               |       |        | 0.02                                      | 0.02          | 0.85       | 0.00               | 0.001         | 0.02       | 0.14                                      | 0.091         | 7.275      | 0.015              | 0.01          | 0.169      |
| 4E10     |        |               |       |        | 0.08                                      | 0.08          | 2.61       | 0.01               | 0.004         | 0.03       | 0.34                                      | 0.311         | >10        | 0.05               | 0.031         | 0.212      |
