# Supplementary material for: An HIV-1 gp41 peptide-liposome vaccine elicits neutralizing epitope-targeted antibody responses in healthy individuals
Source: PubMed Central journal article supplement — medRxiv. 2025 Aug 22:2024.03.15.24304305. Originally published 2024 Mar 18. Preprint. [Version 2] doi: 10.1101/2024.03.15.24304305 (PMC10984077; doi:10.1101/2024.03.15.24304305), 2025-08-22
Supplement: media-3.pdf [file media-3.pdf]

**Table S3: Neutralization profile of sera Abs in HVTN133**

**Assays:** Neutralization in T2M-bl/T2M-bl/FcγR1 cells

**Viruses:** All are Env-pseudotyped viruses produced in 293T cells

**Vaccine groups:**

Low dose (T1), Placebo (C1)

High dose (T2), Placebo (C2)

| Protocol | PTID   | Vaccine Group | Visit | Sample | ID50 (dilution) in T2M-bl or T2M-bl/FcγR1 |              |                    |              | ID80 (dilution) in T2M-bl or T2M-bl/FcγR1 |              |                    |              |             |     |
|----------|--------|---------------|-------|--------|-------------------------------------------|--------------|--------------------|--------------|-------------------------------------------|--------------|--------------------|--------------|-------------|-----|
|          |        |               |       |        | T2M-bl cells                              |              | T2M-bl/FcγR1 cells |              | T2M-bl cells                              |              | T2M-bl/FcγR1 cells |              |             |     |
|          |        |               |       |        | TP02-263                                  | TP02-266     | TP02-264           | TP02-265     | TP02-263                                  | TP02-266     | TP02-264           | TP02-265     |             |     |
|          |        |               |       |        | ID#8334                                   | ID#2209      | ID#8334            | ID#2209      | ID#8334                                   | ID#2209      | ID#8334            | ID#2209      |             |     |
|          |        |               |       | JR-FL  | WITO4160.33                               | JR-FL        | WITO4160.33        | JR-FL        | WITO4160.33                               | JR-FL        | WITO4160.33        | JR-FL        | WITO4160.33 |     |
| HVTN 133 | 133-32 | C2            | 5     | SER    | <10                                       | <10          | <10                | <10          | <10                                       | <10          | <10                | <10          | <10         | <10 |
| HVTN 133 | 133-03 | T2            | 5     | SER    | <10                                       | <10          | <10                | <10          | <10                                       | <10          | <10                | <10          | <10         | <10 |
| HVTN 133 | 133-27 | T2            | 5     | SER    | <10                                       | <10          | <10                | <10          | <10                                       | <10          | <10                | <10          | <10         | <10 |
| HVTN 133 | 133-06 | T2            | 5     | SER    | <10                                       | <10          | <10                | <10          | <10                                       | <10          | <10                | <10          | <10         | <10 |
| HVTN 133 | 133-37 | T2            | 5     | SER    | <10                                       | <10          | <10                | <10          | <10                                       | <10          | <10                | <10          | <10         | <10 |
| HVTN 133 | 133-25 | T2            | 5     | SER    | <10                                       | <10          | <10                | <10          | <10                                       | <10          | <10                | <10          | <10         | <10 |
| HVTN 133 | 133-39 | T1            | 5     | SER    | <10                                       | <10          | <10                | <10          | <10                                       | <10          | <10                | <10          | <10         | <10 |
| HVTN 133 | 133-04 | T1            | 5     | SER    | <10                                       | <10          | <10                | <10          | <10                                       | <10          | <10                | <10          | <10         | <10 |
| HVTN 133 | 133-07 | T1            | 5     | SER    | <10                                       | <10          | <10                | <10          | <10                                       | <10          | <10                | <10          | <10         | <10 |
| HVTN 133 | 133-17 | C1            | 5     | SER    | <10                                       | <10          | <10                | <10          | <10                                       | <10          | <10                | <10          | <10         | <10 |
| HVTN 133 | 133-35 | T1            | 5     | SER    | <10                                       | <10          | <10                | <10          | <10                                       | <10          | <10                | <10          | <10         | <10 |
| HVTN 133 | 133-23 | T1            | 5     | SER    | <10                                       | <10          | <10                | <10          | <10                                       | <10          | <10                | <10          | <10         | <10 |
| HVTN 133 | 133-30 | T2            | 5     | SER    | <10                                       | <10          | <10                | <10          | <10                                       | <10          | <10                | <10          | <10         | <10 |
| HVTN 133 | 133-02 | C2            | 5     | SER    | <10                                       | <10          | <10                | <10          | <10                                       | <10          | <10                | <10          | <10         | <10 |
| HVTN 133 | 133-13 | T2            | 5     | SER    | <10                                       | <10          | <10                | <10          | <10                                       | <10          | <10                | <10          | <10         | <10 |
| HVTN 133 | 133-12 | T2            | 5     | SER    | <10                                       | <10          | <10                | <10          | <10                                       | <10          | <10                | <10          | <10         | <10 |
| HVTN 133 | 133-29 | T2            | 5     | SER    | <10                                       | <10          | <10                | <10          | <10                                       | <10          | <10                | <10          | <10         | <10 |
| HVTN 133 | 133-20 | T2            | 5     | SER    | <10                                       | <10          | <10                | <10          | <10                                       | <10          | <10                | <10          | <10         | <10 |
| HVTN 133 | 133-31 | T2            | 5     | SER    | <10                                       | <10          | <10                | <10          | <10                                       | <10          | <10                | <10          | <10         | <10 |
| HVTN 133 | 133-01 | C2            | 5     | SER    | <10                                       | <10          | <10                | <10          | <10                                       | <10          | <10                | <10          | <10         | <10 |
| HVTN 133 | 133-33 | T2            | 5     | SER    | <10                                       | <10          | <10                | <10          | <10                                       | <10          | <10                | <10          | <10         | <10 |
| HVTN 133 | 133-18 | T2            | 5     | SER    | <10                                       | <10          | <10                | <10          | <10                                       | <10          | <10                | <10          | <10         | <10 |
| HVTN 133 | 133-24 | T2            | 5     | SER    | <10                                       | <10          | <10                | <10          | <10                                       | <10          | <10                | <10          | <10         | <10 |
| HVTN 133 | 133-21 | T2            | 5     | SER    | <10                                       | <10          | <10                | <10          | <10                                       | <10          | <10                | <10          | <10         | <10 |
| HVTN 133 | 133-32 | C2            | 7     | SER    | <10                                       | <10          | <10                | <10          | <10                                       | <10          | <10                | <10          | <10         | <10 |
| HVTN 133 | 133-07 | T1            | 7     | SER    | <10                                       | <10          | <10                | <10          | <10                                       | <10          | <10                | <10          | <10         | <10 |
| HVTN 133 | 133-23 | T1            | 7     | SER    | <10                                       | <10          | <10                | <10          | <10                                       | <10          | <10                | <10          | <10         | <10 |
| HVTN 133 | 133-35 | T1            | 7     | SER    | <10                                       | <10          | <10                | <10          | <10                                       | <10          | <10                | <10          | <10         | <10 |
| HVTN 133 | 133-17 | C1            | 7     | SER    | <10                                       | <10          | <10                | <10          | <10                                       | <10          | <10                | <10          | <10         | <10 |
| HVTN 133 | 133-39 | T1            | 7     | SER    | <10                                       | <10          | <10                | <10          | <10                                       | <10          | <10                | <10          | <10         | <10 |
| HVTN 133 | 133-33 | T2            | 7     | SER    | <10                                       | <10          | <10                | <10          | <10                                       | <10          | <10                | <10          | <10         | <10 |
| CH01-31  |        |               |       |        | <b>0.024</b>                              | <b>0.014</b> | <b>0.015</b>       | <b>0.004</b> | <b>0.067</b>                              | <b>0.058</b> | <b>0.035</b>       | <b>0.023</b> |             |     |
| 2F5      |        |               |       |        | <b>1.489</b>                              | <b>0.974</b> | <b>&lt;0.0001</b>  | <b>0.002</b> | <b>&gt;10</b>                             | <b>4.266</b> | <b>0.059</b>       | <b>0.102</b> |             |     |
| 4E10     |        |               |       |        | <b>7.17</b>                               | <b>1.933</b> | <b>0.016</b>       | <b>0.028</b> | <b>&gt;10</b>                             | <b>7.613</b> | <b>0.217</b>       | <b>0.249</b> |             |     |
