# Supplementary material for: An HIV-1 gp41 peptide-liposome vaccine elicits neutralizing epitope-targeted antibody responses in healthy individuals
Source: PubMed Central journal article supplement — medRxiv. 2025 Aug 22:2024.03.15.24304305. Originally published 2024 Mar 18. Preprint. [Version 2] doi: 10.1101/2024.03.15.24304305 (PMC10984077; doi:10.1101/2024.03.15.24304305), 2025-08-22
Supplement: NIHPP2024.03.15.24304305V1-supplement-1.pdf [file NIHPP2024.03.15.24304305V1-supplement-1.pdf]

## Figure S1

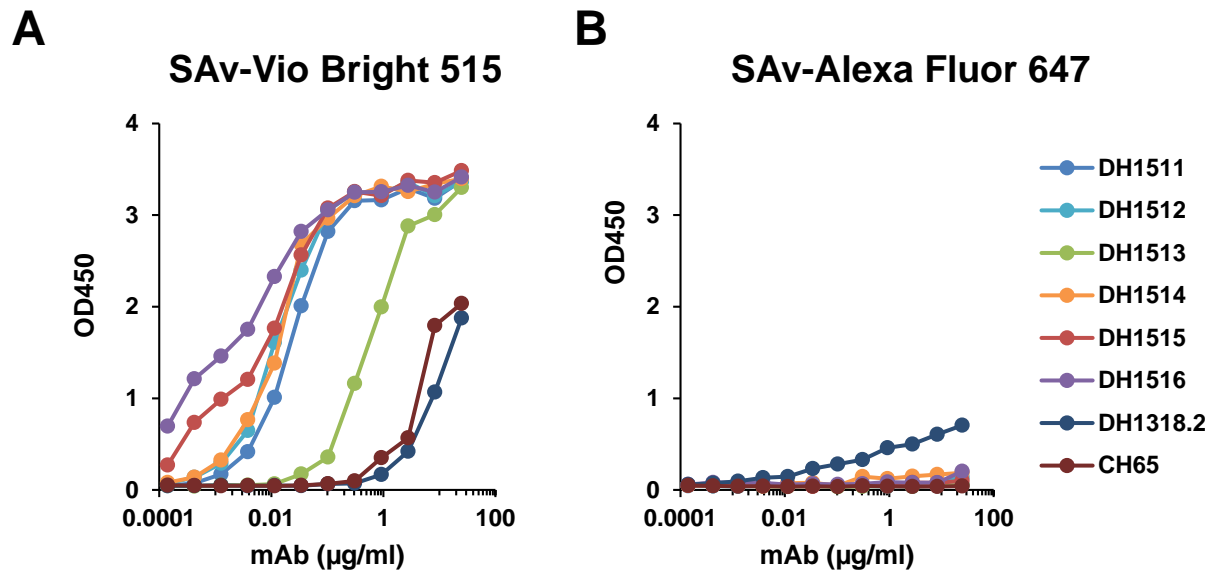

**Figure S1. Binding Profile of PEG-reactive Mabs against Fluorophores used in B cell Sorting.** PEG Specific mAbs (DH1511-DH1516), anti-MPER mAb (DH1318.2), and anti-influenza HA (CH65), were tested by ELISA for binding to commercial Streptavidin-fluorochrome conjugates SAV-Vio Bright 515 and SAV-Alexa Fluor647. **(A)** All six PEG-specific mAbs bound to SAV-Vio Bright 515 whereas DH1318.2 and CH65 exhibited minimal binding. **(B)** PEG-specific mAbs, anti-MPER mAb DH1318.2, and CH65 exhibited minimal binding to SAV-Alexa Fluor647.
